# Supplementary material for: Early motor deficits, sleep dysfunction and reduction in dopaminergic neurons in a park7 -/- zebrafish larval model of Parkinson’s disease
Source: Research Square preprint supplement (doi:10.21203/rs.3.rs-7848595/v1), 2025-11-14
Supplement: Supplementary file 1 [file 9cd9acc3036ec9447b556d67.docx]

**Supplementary figures**

**
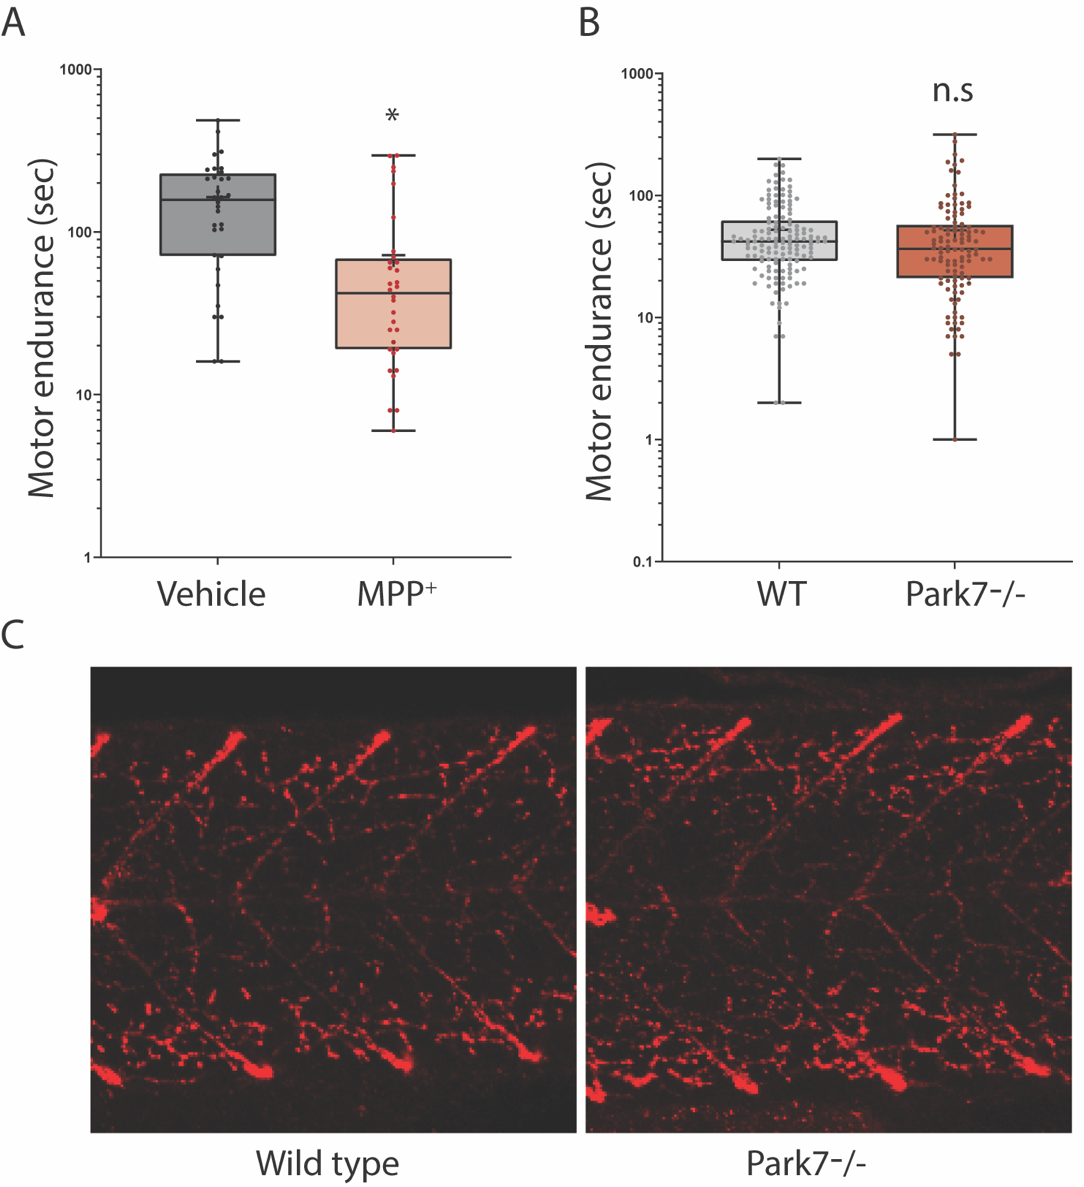
**

**Supplementary Figure 1 - Motor endurance and neuro-muscular junctions are not affected in the** *park7***-/- larvae.** (**A**) MPP+ treatment reduced the motor endurance of 7 dpf wild-type zebrafish, compared to untreated controls; **p* < 0.05, Mann-Whitney test, *n* = 32 per condition. (**B**) *park7*-/- zebrafish showed motor endurance similar to the respective wild-type control zebrafish; *p* > 0.05, Mann-Whitney test, *n* = 112-140 per condition. **(C)** Whole-mount antibody labelling with anti-synaptic vesicle 2 showing neuromuscular junctions in 5 dpf wild type and *park7*-/- larvae.


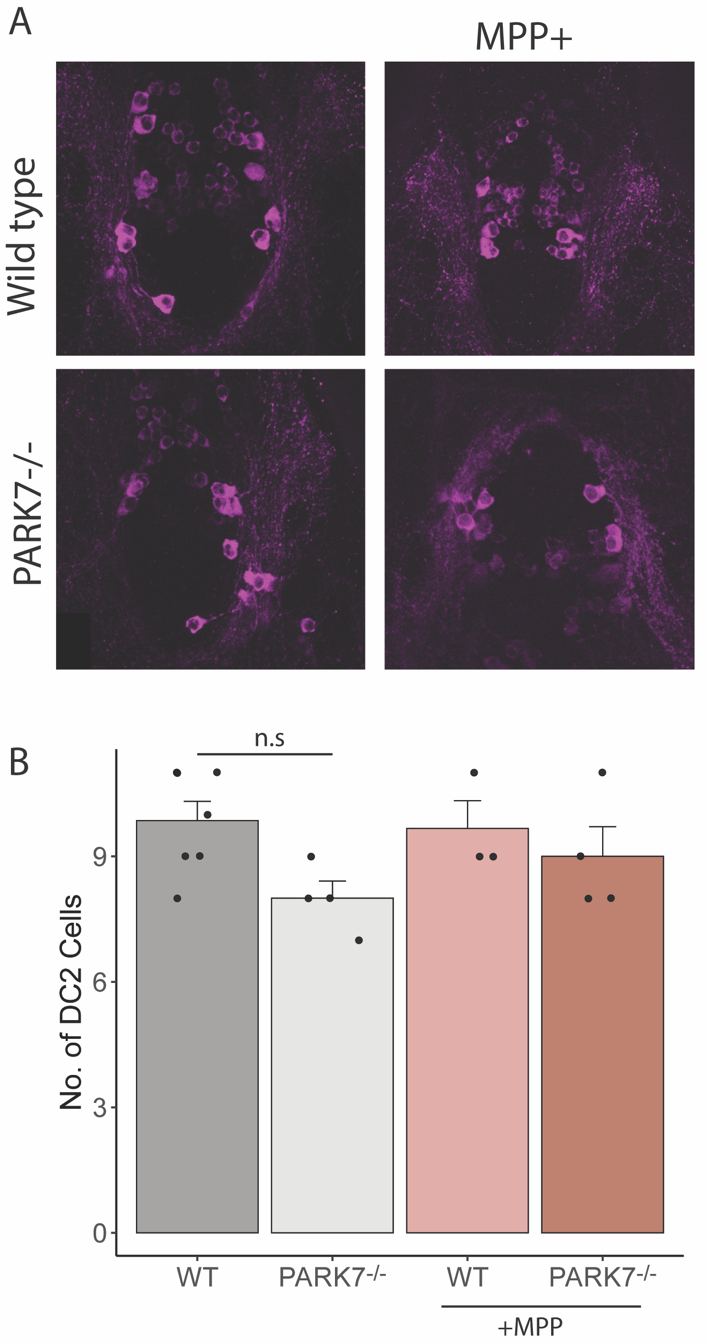


**Supplementary Figure 2 - DC2 dopaminergic neurons are not affected by the loss of DJ‑1**

Zebrafish larvae were exposed to 500 µM MPP+ or vehicle from 3-5 dpf, then fixed, bleached, and whole-mount immune-stained using anti-tyrosine hydroxylase. The number of DC2 dopaminergic neurons were counted on projections of immuno-stained and cleared samples. Cells belonging to the DC2 population were recognized as larger than DC1 neurons and situated more ventral. **(A)** Projections ofdopaminergic neurons in the selected DC2 population from wild type, wild type+MPP+, *park7*-/-, and *park7*-/-+MPP+ at 5 dpf. **(B)** Number of dopaminergic cells in DC2 population at 5 dpf. Graph shows the mean ± SEM of 3-6 larvae. n.s: *p* > 0.05 using Type II ANOVA and Tukey-adjusted pairwise comparisons.
