# Supplementary figures and images for: Early motor deficits, sleep dysfunction and reduction in dopaminergic neurons in a park7 -/- zebrafish larval model of Parkinson’s disease
Source: Research Square preprint supplement (doi:10.21203/rs.3.rs-7848595/v1), 2025-11-14

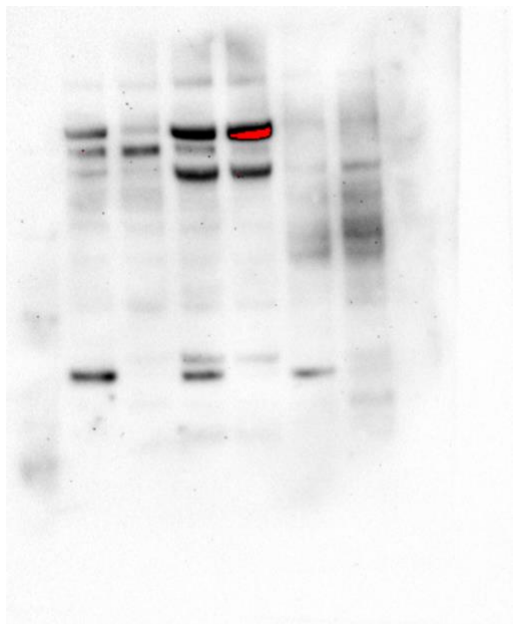

Uncropped Western blot for Fig.1

Supplement: Supplementary file 1 [file 6f6a414cace18705da5cb60b.pdf]
